# Supplementary material for: Development and validation of the atopic dermatitis and infant skincare knowledge, attitude, and practice (ADISKAP 1.0) scale
Source: PubMed Central journal article supplement — Pediatr Investig. 2023 Apr 12;7(3):153–62. doi: 10.1002/ped4.12374 (PMC10509389; doi:10.1002/ped4.12374), 2023-04-12
Supplement: PED4-7-153-s001.pdf [file PED4-7-153-s001.pdf]

**Supplementary Material for**

**Development and validation of the Atopic Dermatitis and Infant Skincare Knowledge,**

**Attitude and Practice (ADISKAP 1.0) scale**

Xiaoyan Sun, Mutong Zhao, Qiong Wu, Jing Tian, Chunping Shen,  
Yuan Liang, Shan Wang, Lei Jiao, Yang Wang, Mingyi Liu, Lin Ma, Xiuhua Ma

**Sheet S1** Items of the 20-item prototype Atopic Dermatitis and Infant Skincare Knowledge Attitude and Practice (ADISKAP) scale

---

1. I should apply body wash every time I bathe my baby.  
 Strongly Agree  Agree  Undecided  Disagree  Strongly Disagree
2. Moisturizer should be applied all over my baby's body.  
 Strongly Agree  Agree  Undecided  Disagree  Strongly Disagree
3. Moisturizer should be used no more than once a day.  
 Strongly Agree  Agree  Undecided  Disagree  Strongly Disagree
4. I only use moisturizer after I bathe my baby.  
 Strongly Agree  Agree  Undecided  Disagree  Strongly Disagree
5. Massage oil can be used as a moisturizer<sup>b</sup>.  
 Strongly Agree  Agree  Undecided  Disagree  Strongly Disagree
6. I do not use moisturizer on my baby at summer time<sup>b</sup>.  
 Strongly Agree  Agree  Undecided  Disagree  Strongly Disagree
7. Timely removal of baby urine and feces helps prevent diaper rash<sup>c</sup>.  
 Strongly Agree  Agree  Undecided  Disagree  Strongly Disagree
8. I'm concerned to use topical corticosteroids on my baby because of the adverse effects<sup>a</sup>.  
 Strongly Agree  Agree  Undecided  Disagree  Strongly Disagree
9. Topical corticosteroids will enter the bloodstream and make babies fat<sup>a</sup>.  
 Strongly Agree  Agree  Undecided  Disagree  Strongly Disagree
10. Topical corticosteroids will enter bloodstream induce precocious puberty in babies<sup>a</sup>.  
 Strongly Agree  Agree  Undecided  Disagree  Strongly Disagree
11. If I had to use topical corticosteroids on my baby, I'd be concerned that my baby will become addicted to the drug.  
 Strongly Agree  Agree  Undecided  Disagree  Strongly Disagree
12. If I had to use topical corticosteroids on my baby, I'd be concerned that my baby will become resistant to the drug.  
 Strongly Agree  Agree  Undecided  Disagree  Strongly Disagree
13. When bathing my baby, I set the temperature at above 40 °C.  
 Strongly Agree  Agree  Undecided  Disagree  Strongly Disagree
14. My baby should be scrubbed regularly when bathing.  
 Strongly Agree  Agree  Undecided  Disagree  Strongly Disagree
15. I dry my baby off naturally in a warm place after bathing.  
 Strongly Agree  Agree  Undecided  Disagree  Strongly Disagree

16. My baby's bath time should be kept within 10 minutes.

Strongly Agree  Agree Undecided Disagree Strongly Disagree

17. It is not necessary to use makeup removal for removing of the sunscreen in babies<sup>c</sup>.

Strongly Agree  Agree Undecided Disagree Strongly Disagree

18. The best way for sun protection is to keep my baby shielded from the sun using an umbrella, hood of a stroller or clothing<sup>c</sup>.

Strongly Agree  Agree Undecided Disagree Strongly Disagree

19. The use of makeup removal is not necessary for removing baby sunscreens<sup>c</sup>.

Strongly Agree  Agree Undecided Disagree Strongly Disagree

20. Sun protection is not necessary in babies<sup>c</sup>.

Strongly Agree  Agree Undecided Disagree Strongly Disagree

---

<sup>a</sup>Items rephrased for being double-barreled questions.

<sup>b</sup>Items rephrased for clarity.

<sup>c</sup>Removed at the expert panel discussion.

**Sheet S2** Items of the Atopic Dermatitis and Infant Skincare Knowledge, Attitude and Practice scale 1.0 (ADISKAP 1.0)

---

1. I should apply body wash every time I bathe my baby.  
Strongly Agree  Agree Undecided Disagree Strongly Disagree
  2. Moisturizer should be applied all over my baby's body.  
Strongly Agree  Agree Undecided Disagree Strongly Disagree
  3. Moisturizer should be used no more than once a day.  
Strongly Agree  Agree Undecided Disagree Strongly Disagree
  4. I only use moisturizer after I bathe my baby.  
Strongly Agree  Agree Undecided Disagree Strongly Disagree
  5. Massage oil is an adequate supplement for baby moisturizer.  
Strongly Agree  Agree Undecided Disagree Strongly Disagree
  6. Moisturizer is not necessary for my baby at summer time.  
Strongly Agree  Agree Undecided Disagree Strongly Disagree
  7. Sweat is an irritant to the baby's skin.  
Strongly Agree  Agree Undecided Disagree Strongly Disagree
  8. I'm concerned to use topical corticosteroids ointment on my baby.  
Strongly Agree  Agree Undecided Disagree Strongly Disagree
  9. Topical corticosteroids will make babies fat.  
Strongly Agree  Agree Undecided Disagree Strongly Disagree
  10. Topical corticosteroids will induce premature puberty.  
Strongly Agree  Agree Undecided Disagree Strongly Disagree
  11. If I had to use topical corticosteroids on my baby, I'd be concerned that my baby will become addicted to the drug.  
Strongly Agree  Agree Undecided Disagree Strongly Disagree
  12. If I had to use topical corticosteroids on my baby, I'd be concerned that my baby will become resistant to the drug.  
Strongly Agree  Agree Undecided Disagree Strongly Disagree
-

**Sheet S3** Items of the Atopic Dermatitis and Infant Skincare Knowledge,  
Attitude and Practice scale 1.0 (ADISKAP 1.0, Chinese)

---

1. 每次给宝宝沐浴都应该使用沐浴液等清洁产品  
非常同意    同意    不确定    不同意    非常不同意
  2. 润肤产品应该给宝宝全身涂抹  
非常同意    同意    不确定    不同意    非常不同意
  3. 润肤产品应用不能超过每天一次  
非常同意    同意    不确定    不同意    非常不同意
  4. 我每次只在宝宝沐浴后给宝宝使用润肤产品  
非常同意    同意    不确定    不同意    非常不同意
  5. 抚触油可以替代润肤产品  
非常同意    同意    不确定    不同意    非常不同意
  6. 夏天不需要使用润肤产品  
非常同意    同意    不确定    不同意    非常不同意
  7. 汗液会刺激宝宝皮肤  
非常同意    同意    不确定    不同意    非常不同意
  8. 给宝宝应用外用糖皮质激素我会有顾虑  
非常同意    同意    不确定    不同意    非常不同意
  9. 外用糖皮质激素会让宝宝变胖  
非常同意    同意    不确定    不同意    非常不同意
  10. 外用糖皮质激素会让宝宝提前发育  
非常同意    同意    不确定    不同意    非常不同意
  11. 如果需要给宝宝使用外用糖皮质激素，我会担心药物依赖的问题  
非常同意    同意    不确定    不同意    非常不同意
  12. 如果需要给宝宝使用外用糖皮质激素，我会担心以后再就没有效果了  
非常同意    同意    不确定    不同意    非常不同意
-
